# Supplementary material
Source: PubMed Central journal article supplement (PMC5858928)
Supplement: NIHMS930342-supplement-1.pdf [file NIHMS930342-supplement-1.pdf]

## Supplementary Figure 1

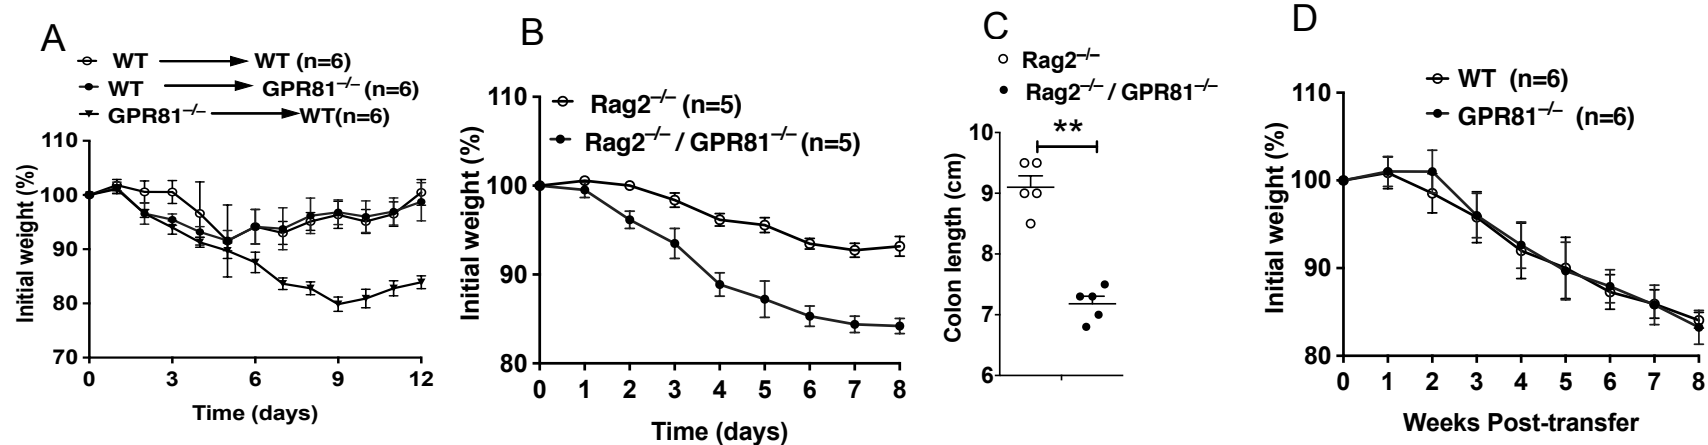

**Supplementary Figure 1: GPR81-signaling in immune cells limits colitis in mice.** **(A)** Reciprocal bone marrow chimeras of WT (CD45.1) and GPR81<sup>-/-</sup> (CD45.2) mice were treated with 2.5% DSS in drinking water for 6 days. Weight loss in WT → WT, WT → GPR81<sup>-/-</sup> and GPR81<sup>-/-</sup> → WT group mice in response to DSS treatment. **(B, C)** Rag2<sup>-/-</sup>/GPR81<sup>-/-</sup> and Rag2<sup>-/-</sup> mice (littermate control) were treated with 2.5% DSS in drinking water for 5 days and at day 9 colons of mice were analyzed for inflammation. **(B, C)** Change in body weight and colon length (day 9) of Rag2<sup>-/-</sup>/GPR81<sup>-/-</sup> and Rag2<sup>-/-</sup> mice. **(D)** CD45RB<sup>hi</sup>CD4<sup>+</sup> T cells isolated from WT or GPR81<sup>-/-</sup> mice were adoptively transferred into Rag2<sup>-/-</sup> mice. Weight loss in Rag2<sup>-/-</sup> mice at indicated time points (weeks) post naïve CD4<sup>+</sup> T cell adoptive transfer. Data are representative of two independent experiments. Error bars indicate mean ± SEM.

## Supplementary Figure 2

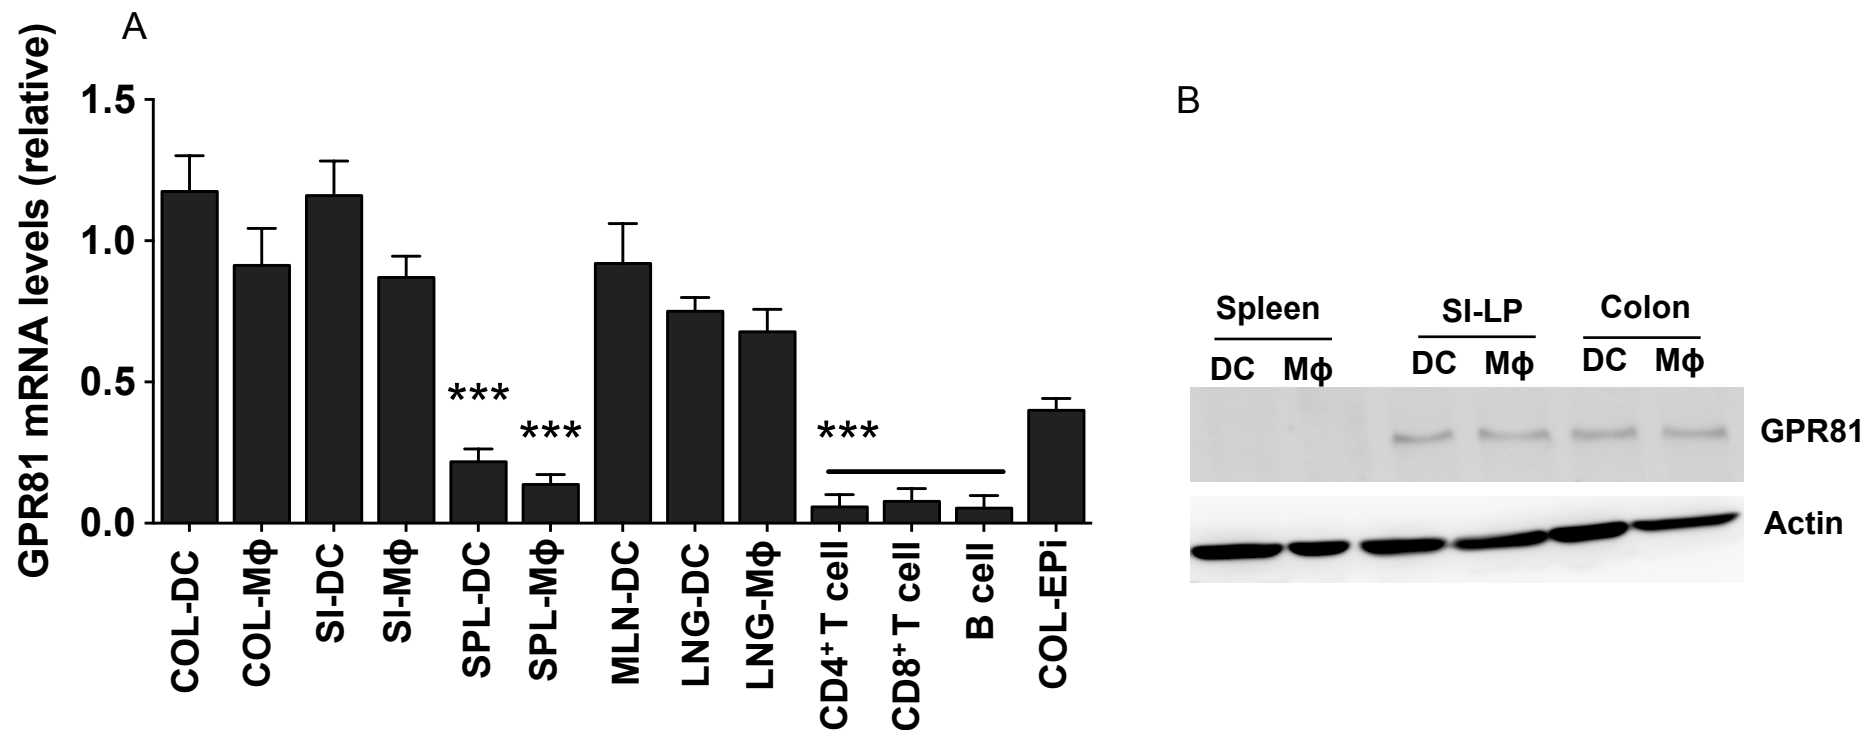

**Supplementary Figure 2: GPR81 expression levels in immune cells.** (A) Quantitative real-time PCR analysis of mRNA expression of GPR81 in DCs, macrophages (Mφ), epithelial cells (EPi), CD4<sup>+</sup> T cells, CD8<sup>+</sup> T cells and B cells isolated from the colon (COL), spleen (SPL), mesenteric lymph nodes (MLN) and lung (LNG) of WT mice (n=3). (B) Western blot analysis of GPR81 in cell lysate DC and macrophages isolated from the spleen, small intestine lamina propria (SI-LP) and colon of WT mice.

### Supplementary Figure 3

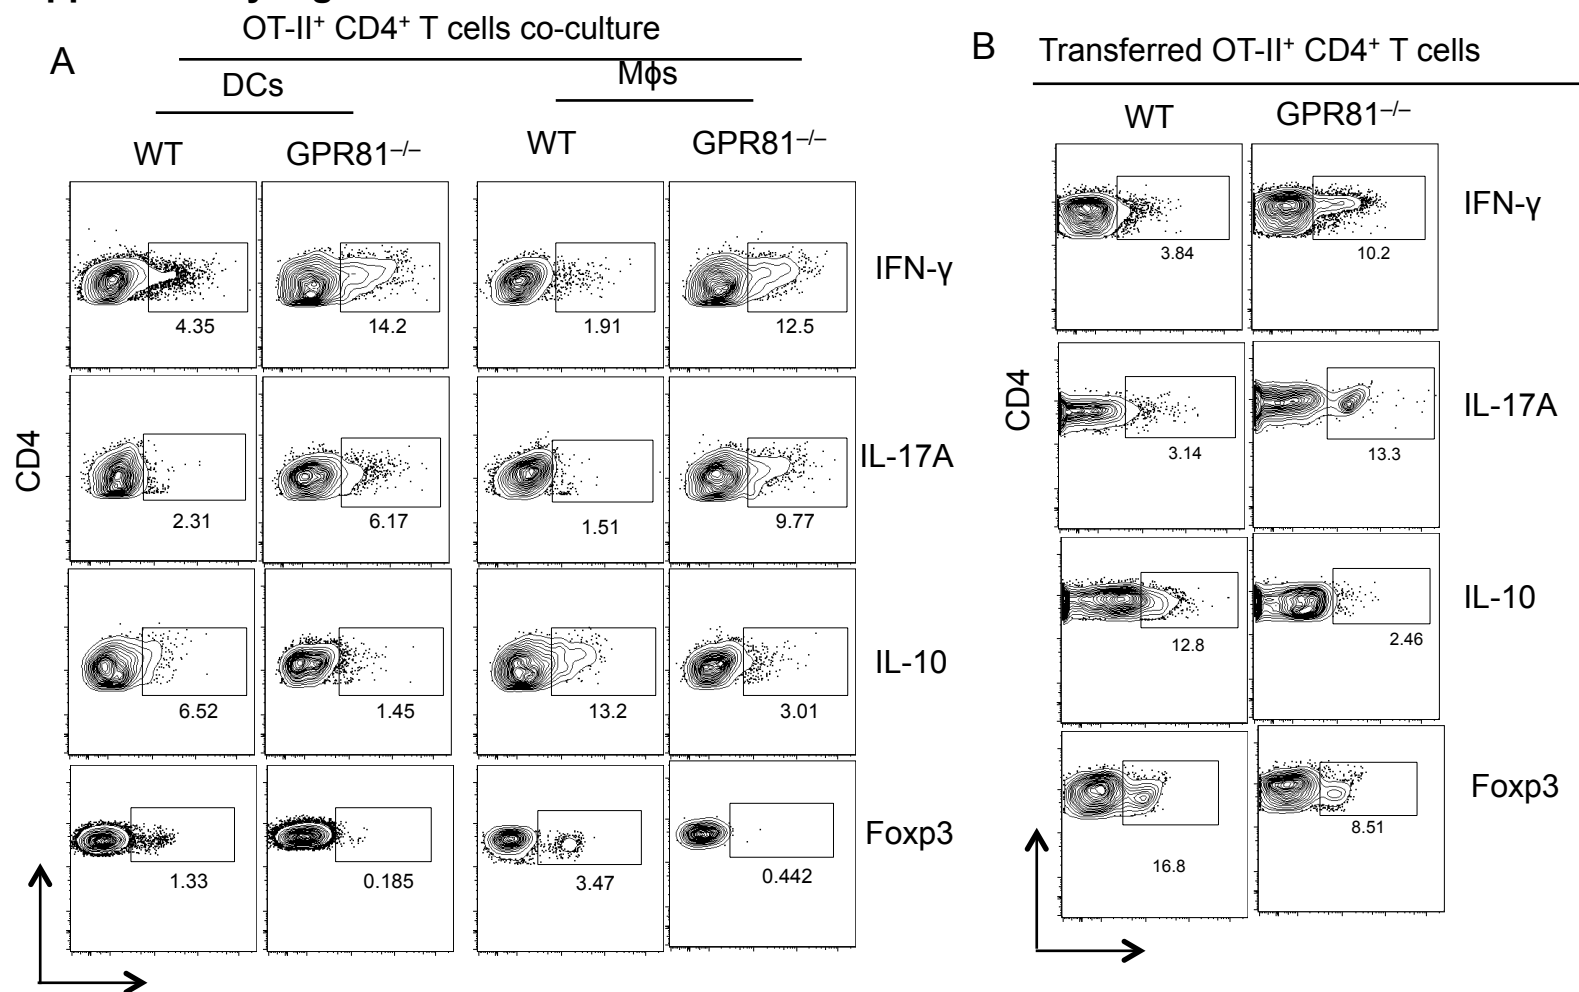

**Supplementary Figure 3: GPR81 signaling in intestinal APCs suppresses Th1/Th17 cell differentiation and induces regulatory T cell differentiation.** (A) Representative FACS plots showing the frequencies of IL-17A<sup>+</sup>, IFN-γ<sup>+</sup>, Foxp3<sup>+</sup> and IL-10<sup>+</sup> OT-II CD4<sup>+</sup> T cells after culturing with colonic DCs and macrophages isolated from GPR81<sup>-/-</sup> and WT mice. (B) Representative FACS plots showing the frequencies of adoptively transferred naïve OT-II CD4<sup>+</sup> T cells positive for IFN-γ, IL-17A, Foxp3 and/or IL-10 isolated from colons of WT and GPR81<sup>-/-</sup> mice treated orally with OVA protein.

## Supplementary Figure 4

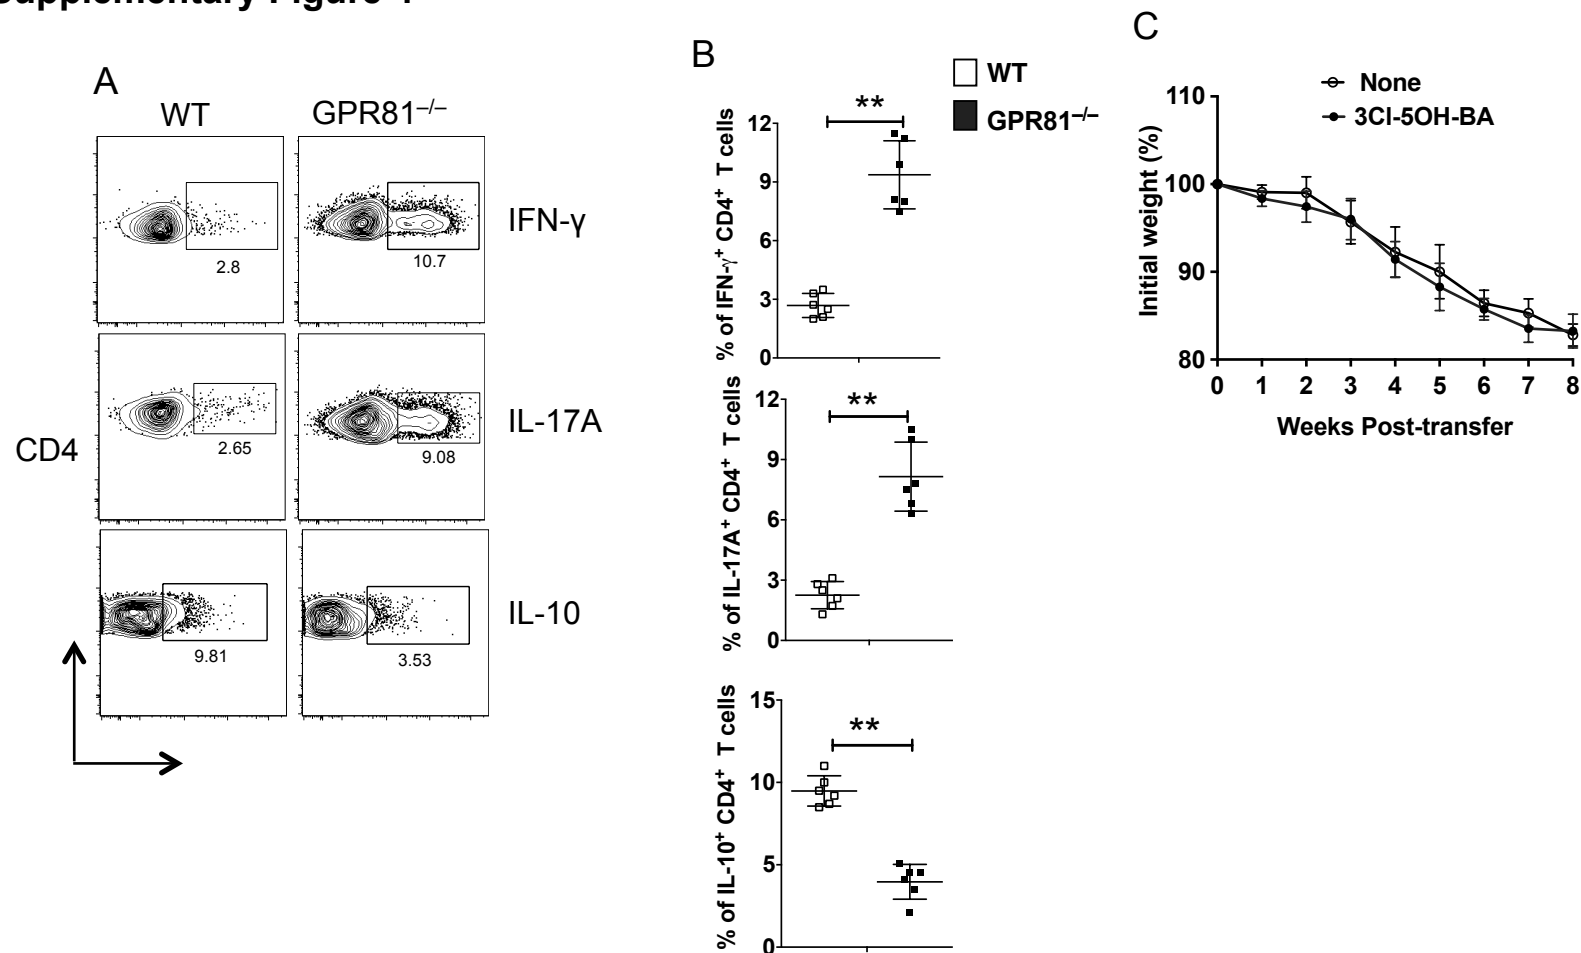

**Supplementary Figure 4: GPR81-signaling regulates balance between regulatory T cell and Th1/Th17 cell numbers in the colon. (A,B)** Representative FACS plot and cumulative frequencies of endogenous CD4<sup>+</sup> T cells positive for IL-17A, IFN- $\gamma$  and IL-10 in the colon of GPR81<sup>-/-</sup> and WT mice. **(C) GPR81 agonist treatment did not protect Rag2<sup>-/-</sup> /GPR81<sup>-/-</sup> mice from T-cell transfer model of experimental colitis.** CD45RB<sup>hi</sup>CD4<sup>+</sup> T cells isolated from WT mice were adoptively transferred into Rag2<sup>-/-</sup> /GPR81<sup>-/-</sup> mice. Animals were treated with GPR81 agonist orally (3-chloro-5-hydroxybenzoic acid (3CI-5OH-BA); 10 mg/kg; on Weeks 1, 2, 3 and 4) and monitored over a period of time for percent weight loss compared to initial weight. Data are representative of two independent experiments (n=5). Error bars indicate mean  $\pm$  SEM.
